# Supplementary material for: Possible modification of BRSK1 on the risk of alkylating chemotherapy-related reduced ovarian function
Source: PubMed Central journal article supplement — Hum Reprod. 2021 Feb 14;36(4):1120–33. doi: 10.1093/humrep/deaa342 (PMC7970730; doi:10.1093/humrep/deaa342), 2021-02-14
Supplement: deaa342_supplementary_figure_s1.pdf [file deaa342_supplementary_figure_s1.pdf]

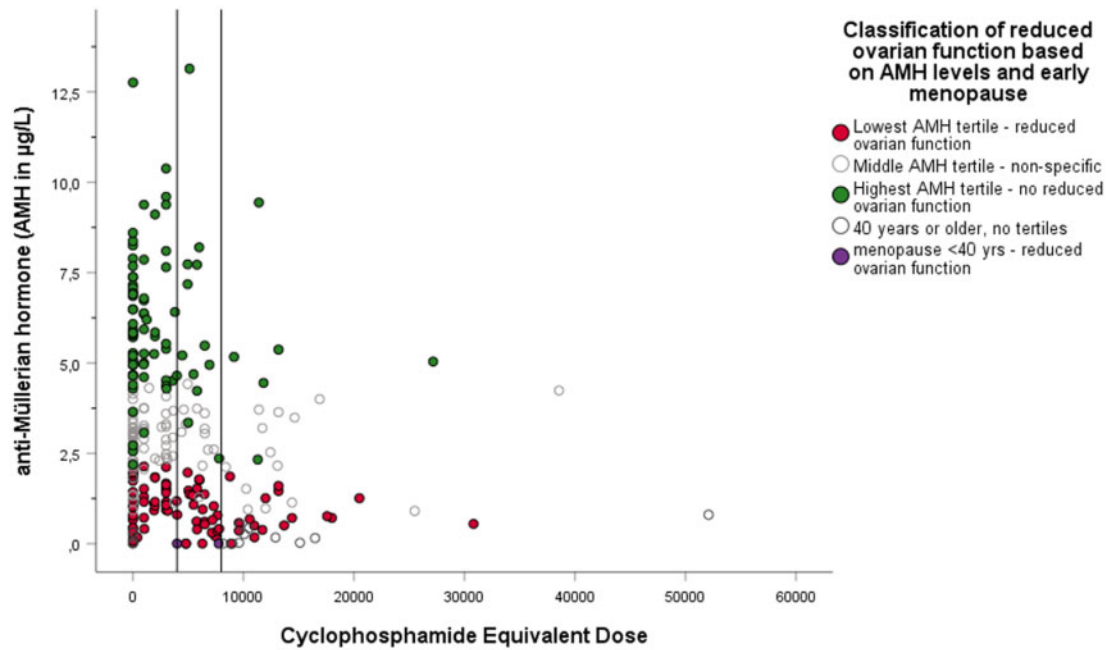

**Supplementary Figure S1. Scatterplot of cyclophosphamide equivalent dose (CED) by anti-Müllerian hormone (AMH).**

Scatterplot of cyclophosphamide equivalent dose (CED, in  $\text{mg}/\text{m}^2$ ) by anti-Müllerian hormone (AMH in  $\mu\text{g}/\text{l}$ ) in the discovery DCOG-Later VEVO cohort, displaying the outliers in CED score. All  $n = 285$  were included in the linear regression analyses, survivors with reduced ovarian function and survivors without reduced ovarian function were included in the logistic regression models and are depicted in colour.
