# Supplementary material for: Possible modification of BRSK1 on the risk of alkylating chemotherapy-related reduced ovarian function
Source: PubMed Central journal article supplement — Hum Reprod. 2021 Feb 14;36(4):1120–33. doi: 10.1093/humrep/deaa342 (PMC7970730; doi:10.1093/humrep/deaa342), 2021-02-14
Supplement: deaa342_supplementary_figure_s2.pdf [file deaa342_supplementary_figure_s2.pdf]

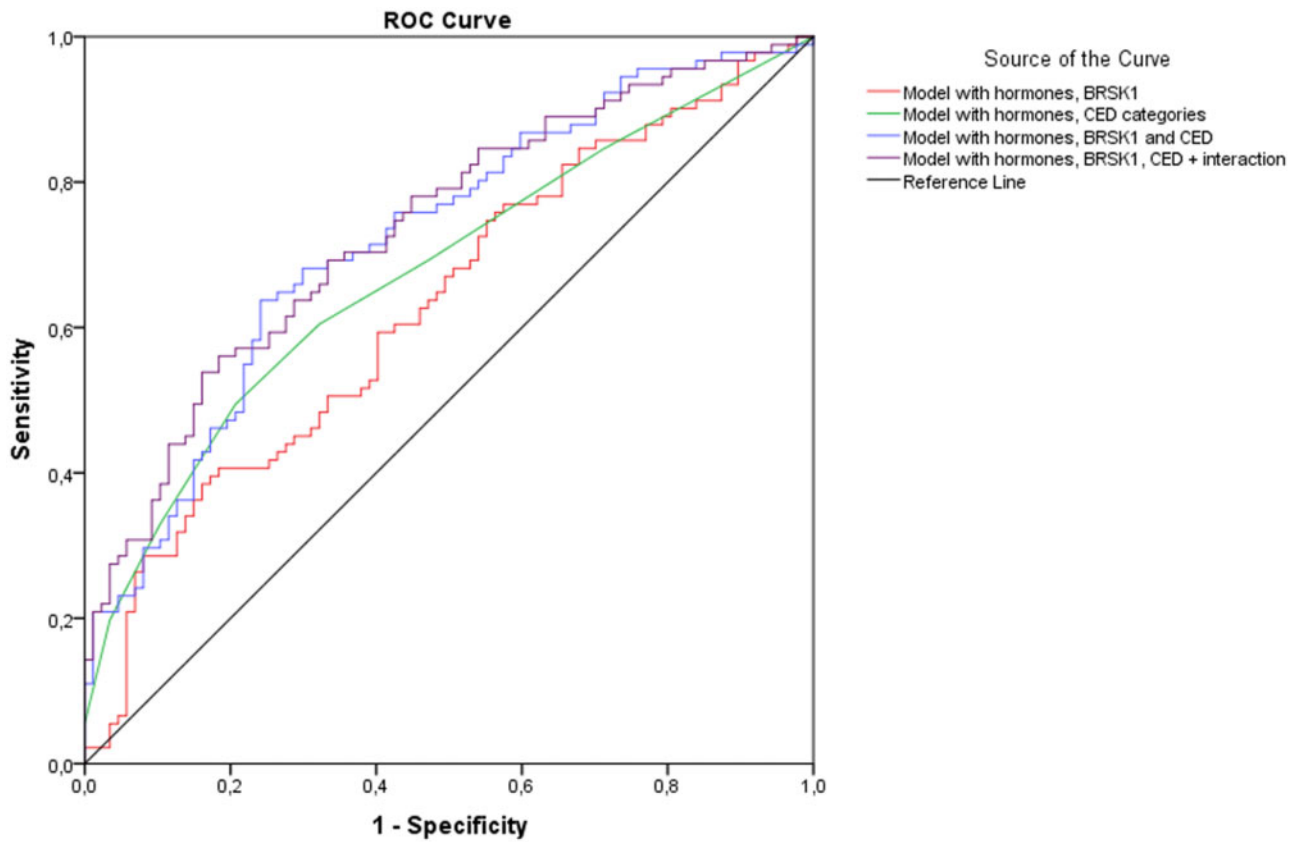

Diagonal segments are produced by ties.

**Area Under the Curve**

| Test Result Variable(s)             | Area  | Std. Error <sup>a</sup> | Asymptotic Sig. <sup>b</sup> | Asymptotic 95% Confidence Interval |             |
|-------------------------------------|-------|-------------------------|------------------------------|------------------------------------|-------------|
|                                     |       |                         |                              | Lower Bound                        | Upper Bound |
| Model with BRSK1 only               | 0.630 | 0.042                   | 0.003                        | 0.548                              | 0.711       |
| Model with CED categories only      | 0.676 | 0.040                   | 0.000                        | 0.598                              | 0.755       |
| Model with BRSK1 and CED            | 0.722 | 0.038                   | 0.000                        | 0.648                              | 0.796       |
| Model with BRSK1, CED + interaction | 0.736 | 0.037                   | 0.000                        | 0.663                              | 0.808       |

The test result variable(s): Model with CED categories only has at least one tie between the positive actual state group and the negative actual state group. Statistics may be biased.

a. Under the nonparametric assumption

b. Null hypothesis: true area = 0.5

**Supplementary Figure S2. ROC based on discovery cohort.**
