# Supplementary material for: Possible modification of BRSK1 on the risk of alkylating chemotherapy-related reduced ovarian function
Source: PubMed Central journal article supplement — Hum Reprod. 2021 Feb 14;36(4):1120–33. doi: 10.1093/humrep/deaa342 (PMC7970730; doi:10.1093/humrep/deaa342), 2021-02-14
Supplement: deaa342_supplementary_tables1.pdf [file deaa342_supplementary_tables1.pdf]

human reproduction **SUPPLEMENTARY DATA**

**Supplementary Table S1 AMH levels in tertiles by CED categories.**

|                             | n  | DCOG LATER-VEVO   | n  | PanCareLIFE       | n  | St. Jude Lifetime |
|-----------------------------|----|-------------------|----|-------------------|----|-------------------|
| <b>CED score 0</b>          |    |                   |    |                   |    |                   |
| Lowest AMH tertile          | 22 | 1.10 (0.01–2.14)  | 27 | 0.82 (0.01–1.71)  | 51 | 1.09 (0.01–2.20)  |
| Middle AMH tertile          | 43 | 2.77 (0.03–4.59)  | 60 | 2.20 (0.49–3.38)  | 54 | 2.44 (1.14–3.56)  |
| Highest AMH tertile         | 38 | 5.81 (2.19–8.60)  | 74 | 5.00 (1.93–13.50) | 62 | 4.72 (2.24–10.48) |
| <b>CED score &gt;0–4000</b> |    |                   |    |                   |    |                   |
| Lowest AMH tertile          | 24 | 1.17 (0.18–2.14)  | 16 | 0.88 (0.05–1.79)  | 3  | 0.74 (0.38–1.50)  |
| Middle AMH tertile          | 25 | 2.94 (1.13–4.31)  | 48 | 2.33 (0.13–3.39)  | 6  | 2.01 (1.33–3.05)  |
| Highest AMH tertile         | 31 | 5.93 (3.07–12.76) | 39 | 4.71 (1.96–10.94) | 4  | 4.38 (3.58–7.55)  |
| <b>CED score ≥4000–8000</b> |    |                   |    |                   |    |                   |
| Lowest AMH tertile          | 28 | 0.72 (0.01–1.97)  | 25 | 0.68 (0.01–1.68)  | 26 | 0.94 (0.15–1.98)  |
| Middle AMH tertile          | 12 | 3.14 (1.29–4.42)  | 26 | 2.02 (0.13–3.29)  | 20 | 2.48 (1.30–3.48)  |
| Highest AMH tertile         | 12 | 5.35 (2.36–13.14) | 17 | 4.61 (3.52–18.50) | 14 | 5.03 (3.96–9.21)  |
| <b>CED score ≥8000</b>      |    |                   |    |                   |    |                   |
| Lowest AMH tertile          | 17 | 0.68 (0.01–1.86)  | 79 | 0.20 (0.01–1.74)  | 26 | 0.76 (0.01–1.95)  |
| Middle AMH tertile          | 18 | 1.82 (0.03–4.24)  | 31 | 2.00 (0.01–8.89)  | 22 | 2.42 (1.32–3.57)  |
| Highest AMH tertile         | 6  | 5.11 (2.33–9.44)  | 23 | 4.09 (2.04–9.46)  | 24 | 3.76 (2.38–11.90) |

Values are represented as the median (minimum–maximum), unless indicated otherwise.

AMH, anti-Müllerian hormone in µg/L; CED, cyclophosphamide equivalent dose in mg/m<sup>2</sup>; PanCareLIFE, PanCareLIFE cohort; St. Jude Lifetime, St. Jude Lifetime Cohort; VEVO, DCOG-LATER VEVO cohort.
