# Supplementary material for: Possible modification of BRSK1 on the risk of alkylating chemotherapy-related reduced ovarian function
Source: PubMed Central journal article supplement — Hum Reprod. 2021 Feb 14;36(4):1120–33. doi: 10.1093/humrep/deaa342 (PMC7970730; doi:10.1093/humrep/deaa342), 2021-02-14
Supplement: deaa342_supplementary_tables2.pdf [file deaa342_supplementary_tables2.pdf]

**Supplementary Table SII** Details of alkylating agents and additional chemotherapeutics.

|                                           | Discovery DCOG LATER-VEVO<br>(n = 285) | Replication PanCareLIFE<br>(n = 471) | Replication St. Jude Lifetime<br>(n = 391) |
|-------------------------------------------|----------------------------------------|--------------------------------------|--------------------------------------------|
| <b>CED score</b>                          |                                        |                                      |                                            |
| CED score 0                               | 106 (37.2)                             | 161 (34.6)                           | 198 (50.6)                                 |
| >0–4000 mg/m <sup>2</sup>                 | 80 (28.1)                              | 103 (22.2)                           | 21 (5.4)                                   |
| ≥4000–8000 mg/m <sup>2</sup>              | 52 (18.2)                              | 68 (14.6)                            | 78 (19.9)                                  |
| ≥8000 mg/m <sup>2</sup>                   | 47 (16.5)                              | 133 (28.7)                           | 93 (24.0)                                  |
| <b>Cyclophosphamide</b>                   | 130 (45.6)                             | 236 (50.8)                           | 175 (44.9)                                 |
| If yes, dose in mg/m <sup>2</sup> :       | 3000                                   | 3200                                 | 7122                                       |
| Median (range)                            | (400–52 087)                           | (330–1 286 400)                      | (1332–25 063)                              |
| <b>Ifosfamide</b>                         | 40 (14.0)                              | 99 (21.3)                            | 23 (5.9)                                   |
| If yes, dose in mg/m <sup>2</sup> :       | 30 000                                 | 43 546                               | 48 000                                     |
| Median (range)                            | (60–133 443)                           | (18–732 000)                         | (9000–79 606)                              |
| <b>Procarbazine</b>                       | 25 (8.8)                               | 46 (9.9)                             | 25 (6.4)                                   |
| If yes, dose in mg/m <sup>2</sup> :       | 4389                                   | 4290                                 | 4091                                       |
| Median (range)                            | (240–10 369)                           | (8.4–629 000)                        | (1275–14 608)                              |
| <b>Chlorambucil</b>                       | 0 (0)                                  | 11 (2.4)                             | 0 (0)                                      |
| If yes, dose in mg/m <sup>2</sup> :       |                                        | 252                                  |                                            |
| Median (range)                            |                                        | (84–504)                             |                                            |
| <b>BCNU/carmustine</b>                    | 0 (0)                                  | 3 (0.6)                              | 3 (0.8)                                    |
| If yes, dose in mg/m <sup>2</sup> :       |                                        | 300                                  | 97.1                                       |
| Median (range)                            |                                        | (300–500)                            | (88.7–147.6)                               |
| <b>CCNU/lomustine</b>                     | 0 (0)                                  | 0 (0)                                | 3 (0.8)                                    |
| If yes, dose in mg/m <sup>2</sup> :       |                                        |                                      | 429.7                                      |
| Median (range)                            |                                        |                                      | (302.5–446.2)                              |
| <b>Melphalan</b>                          | 0 (0)                                  | 27 (5.8)                             | 0 (0)                                      |
| If yes, dose in mg/m <sup>2</sup> :       |                                        | 140                                  |                                            |
| Median (range)                            |                                        | (100–980)                            |                                            |
| <b>Thio-TEPA</b>                          | 0 (0)                                  | 8 (1.7)                              | 1 (0.3)                                    |
| If yes, dose in mg/m <sup>2</sup> :       |                                        | 778                                  | 400                                        |
| Median (range)                            |                                        | (85–1,395)                           | (400–400)                                  |
| <b>Nitrogen mustard (Mechlorethamine)</b> | 20 (7.0)                               | 8 (1.7)                              | 2 (0.5)                                    |
| If yes, dose in mg/m <sup>2</sup> :       | 36                                     | 36                                   | 28.87                                      |
| Median (range)                            | (23.8–108)                             | (12–120)                             | (14.29–43.45)                              |
| <b>Busulfan</b>                           | 0 (0)                                  | 14 (3.0)                             | 2 (0.5)                                    |
| If yes, dose in mg/m <sup>2</sup> :       |                                        | 447                                  | 419.1                                      |
| Median (range)                            |                                        | (330–600)                            | (360.6–477.7)                              |
| <b>Any alkylating agent</b>               | 181 (63.5)                             | 325 (69.0)                           | 193 (49.4)                                 |
| <b>Any platinum-based agents</b>          | 45 (15.8)                              | 99 (22.6)                            | 39 (10.0)                                  |
| <b>Any anthracyclines</b>                 | 176 (61.8)                             | 354 (76.1)                           | 214 (54.7)                                 |
| <b>Any anti-metabolites</b>               | 149 (52.3)                             | 175 (37.6)                           | 165 (42.2)                                 |
| <b>Any topoisomerase</b>                  | 55 (19.3)                              | 171 (36.8)                           | 124 (31.7)                                 |
| <b>Any mitotic inhibitors</b>             | 252 (88.4)                             | 382 (82.2)                           | 253 (64.7)                                 |
| <b>Any antitumor antibiotics</b>          | 119 (41.8)                             | 184 (39.6)                           | 80 (20.5)                                  |
| <b>Other chemotherapy</b>                 | 108 (37.9)                             | 102 (21.9)                           | 110 (28.1)                                 |

Values are represented as the number (%) of women, or the median (minimum–maximum), unless indicated otherwise.  
PanCareLIFE, PanCareLIFE cohort; St. Jude Lifetime, St. Jude Lifetime Cohort; VEVO, DCOG-LATER VEVO cohort.
