# Supplementary material for: Possible modification of BRSK1 on the risk of alkylating chemotherapy-related reduced ovarian function
Source: PubMed Central journal article supplement — Hum Reprod. 2021 Feb 14;36(4):1120–33. doi: 10.1093/humrep/deaa342 (PMC7970730; doi:10.1093/humrep/deaa342), 2021-02-14
Supplement: deaa342_supplementary_tables5.pdf [file deaa342_supplementary_tables5.pdf]

**Supplementary Table SV Fractional polynomial selection for CED score with alpha = 0.05.**

| <i>Main effects model with alpha = 0.05</i>            |               |            |          |          |           |           |             |
|--------------------------------------------------------|---------------|------------|----------|----------|-----------|-----------|-------------|
| Term                                                   |               |            |          | Estimate | SE        | Statistic | P-value     |
| (Intercept)                                            |               |            |          | -0.382   | 0.335     | -1.142    | 0.253       |
| I(CEDgramNoZero ^0.5)                                  |               |            |          | 0.110    | 0.051     | 2.139     | 0.032       |
| I(CEDgramNoZero ^1)                                    |               |            |          | -0.537   | 0.234     | -2.296    | 0.022       |
| rs11668344                                             |               |            |          | 0.701    | 0.351     | 1.997     | 0.046       |
| Use of hormones                                        |               |            |          | 14.636   | 18.822    | 0.778     | 0.437       |
| PC2                                                    |               |            |          | -19.942  | 18.648    | -1.069    | 0.285       |
| PC3                                                    |               |            |          | 0.389    | 0.426     | 0.912     | 0.362       |
| I(CED > 0)TRUE                                         |               |            |          | -27.339  | 33.893    | -0.807    | 0.420       |
| PC4                                                    |               |            |          | -6.197   | 17.182    | -0.361    | 0.718       |
| PC1                                                    |               |            |          | -0.382   | 0.335     | -1.142    | 0.253       |
|                                                        | null.deviance | df.null    | logLik   | AIC      | BIC       | deviance  | df.residual |
|                                                        | 246.671       | 177        | -111.413 | 240.827  | 269.463   | 222.827   | 169         |
| <i>Interaction effects model with alpha = 0.05</i>     |               |            |          |          |           |           |             |
| Term                                                   |               |            |          | Estimate | std.error | Statistic | P-value     |
| (Intercept)                                            |               |            |          | -0.386   | 0.410     | -0.943    | 0.346       |
| PC1                                                    |               |            |          | -7.533   | 17.336    | -0.435    | 0.664       |
| PC2                                                    |               |            |          | 13.253   | 18.664    | 0.710     | 0.478       |
| PC3                                                    |               |            |          | -23.326  | 18.772    | -1.243    | 0.214       |
| PC4                                                    |               |            |          | -23.416  | 34.592    | -0.677    | 0.498       |
| Use of hormones                                        |               |            |          | 0.751    | 0.359     | 2.090     | 0.037       |
| rs11668344                                             |               |            |          | -0.567   | 0.424     | -1.336    | 0.181       |
| I(CED > 0)TRUE                                         |               |            |          | 0.737    | 0.595     | 1.238     | 0.216       |
| I(CEDgramNoZero ^0.5)                                  |               |            |          | 0.039    | 0.058     | 0.668     | 0.504       |
| I(CEDgramNoZero ^2)                                    |               |            |          | -0.592   | 0.637     | -0.929    | 0.353       |
| rs11668344: I(CED > 0)TRUE                             |               |            |          | 0.126    | 0.075     | 1.675     | 0.094       |
| rs11668344: I(CEDgramNoZero ^0.5)                      |               |            |          | -0.386   | 0.410     | -0.943    | 0.346       |
| rs11668344: I(CEDgramNoZero ^2)                        |               |            |          | -7.533   | 17.336    | -0.435    | 0.664       |
|                                                        | null.deviance | df.null    | logLik   | AIC      | BIC       | deviance  | df.residual |
|                                                        | 246.671       | 177        | -108.031 | 238.062  | 273.061   | 216.062   | 167         |
| <i>Likelihood ratio test for the whole interaction</i> |               |            |          |          |           |           |             |
|                                                        | Resid..Df     | Resid..Dev | df       | Deviance | P-value   |           |             |
|                                                        | 169           | 222.827    | NA       | NA       | NA        |           |             |
|                                                        | 167           | 219.782    | 2        | 3.045    | 0.218     |           |             |

AIC, Akaike Information Criterion; BIC, Bayesian Information Criterion; CED, cyclophosphamide equivalent dose; Dev, Deviance; Df, degrees of freedom; logLik, log Likert; NA, not applicable; PC, Principal Component.
