# Supplementary material for: Possible modification of BRSK1 on the risk of alkylating chemotherapy-related reduced ovarian function
Source: PubMed Central journal article supplement — Hum Reprod. 2021 Feb 14;36(4):1120–33. doi: 10.1093/humrep/deaa342 (PMC7970730; doi:10.1093/humrep/deaa342), 2021-02-14
Supplement: deaa342_supplementary_tables7.pdf [file deaa342_supplementary_tables7.pdf]

**Supplementary Table SVII Association of *BRSK1* (rs1172822) (in LD with rs11668344) with reduced ovarian function and alkylating agents in VEVO discovery cohort.**

| Gene         | Variant   | Chrom | Ref. | Alt. | MAF  | Model | Variant, interaction term      | OR (95% CI)         | P-value |
|--------------|-----------|-------|------|------|------|-------|--------------------------------|---------------------|---------|
| <i>BRSK1</i> | rs1172822 | 19    | C    | T    | 0.35 | 1     | Hormones                       | 1.95 (0.98–3.91)    | 0.006   |
|              |           |       |      |      |      |       | rs1172822                      | 0.63 (0.40–0.99)    | 0.045   |
|              |           |       |      |      |      |       | CED: 0                         | 1 (ref)             | 0.001   |
|              |           |       |      |      |      |       | – >0–4000 mg/m <sup>2</sup>    | 1.37 (0.63–2.98)    | 0.422   |
|              |           |       |      |      |      |       | – ≥4000–8000 mg/m <sup>2</sup> | 4.46 (1.83–10.87)   | 0.001   |
|              |           |       |      |      |      |       | – ≥8000 mg/m <sup>2</sup>      | 4.71 (1.56–14.22)   | 0.006   |
|              |           |       |      |      |      | 2     | Hormones                       | 0.59 (0.26–1.35)    | 0.069   |
|              |           |       |      |      |      |       | rs1172822                      | 0.60 (0.26–1.35)    | 0.210   |
|              |           |       |      |      |      |       | CED: 0                         | 1 (ref)             | 0.192   |
|              |           |       |      |      |      |       | – >0–4000 mg/m <sup>2</sup>    | 1.73 (0.54–5.78)    | 0.357   |
|              |           |       |      |      |      |       | – ≥4000–8000 mg/m <sup>2</sup> | 5.11 (1.17–22.28)   | 0.030   |
|              |           |       |      |      |      |       | – ≥8000 mg/m <sup>2</sup>      | 1.55 (0.36–6.66)    | 0.556   |
|              |           |       |      |      |      |       | SNP*CED: 0                     | 1 (ref)             | 0.184   |
|              |           |       |      |      |      |       | – >0–4000 mg/m <sup>2</sup>    | 0.74 (0.24–2.33)    | 0.610   |
|              |           |       |      |      |      |       | – ≥4000–8000 mg/m <sup>2</sup> | 0.88 (0.23–3.34)    | 0.852   |
|              |           |       |      |      |      |       | – ≥8000 mg/m <sup>2</sup>      | 10.37 (0.95–113.13) | 0.055   |

Alt, alternative allele; CED, cyclophosphamide equivalent dose; Chrom., chromosome; MAF, minor allele frequency; Ref, Reference allele; VEVO, DCOG-LATER VEVO cohort. Model 1: adjusted for principal components, hormone usage and CED score in four categories. Model 2: additional to Model 1 interaction term of variant\*CED category.
