# Supplementary material for: Possible modification of BRSK1 on the risk of alkylating chemotherapy-related reduced ovarian function
Source: PubMed Central journal article supplement — Hum Reprod. 2021 Feb 14;36(4):1120–33. doi: 10.1093/humrep/deaa342 (PMC7970730; doi:10.1093/humrep/deaa342), 2021-02-14
Supplement: deaa342_supplementary_tables8.pdf [file deaa342_supplementary_tables8.pdf]

**Supplementary Table SVIII Association of single-nucleotide polymorphisms with continuous log-transformed AMH-levels in the discovery VEVO cohort (n = 285).**

| Gene         | Variant           | Position     | Chrom | Ref. | Alt. | MAF  | Model        | Variant,<br>interaction term | n alleles 0/1/2 | Beta (SE) logAMH | P-value     |
|--------------|-------------------|--------------|-------|------|------|------|--------------|------------------------------|-----------------|------------------|-------------|
| <b>BRSKI</b> | <b>rs1172822</b>  | 55819845     | 19    | C    | T    | 0.35 | 1            | rs1172822                    | 114/135/36      | 0.09 (0.04)      | 0.040       |
|              |                   |              |       |      |      |      |              | CED 0                        |                 | 0 (ref)          |             |
|              |                   |              |       |      |      |      |              | - >0-4000                    |                 | -0.09 (0.08)     | 0.240       |
|              |                   |              |       |      |      |      |              | - ≥4000-8000                 |                 | -0.32 (0.09)     | 0.000       |
|              |                   |              |       |      |      |      |              | - ≥8000                      |                 | -0.28 (0.09)     | 0.002       |
|              |                   |              |       |      |      |      |              | Hormones                     |                 | -0.28 (0.07)     | 0.000       |
|              |                   |              |       |      |      |      |              | 2                            | rs1172822       |                  | 0.14 (0.08) |
|              |                   |              |       |      |      |      | CED 0        |                              | 0 (ref)         |                  |             |
|              |                   |              |       |      |      |      | - >0-4000    |                              | -0.05 (0.11)    | 0.645            |             |
|              |                   |              |       |      |      |      | - ≥4000-8000 |                              | -0.29 (0.13)    | 0.029            |             |
|              |                   |              |       |      |      |      | - ≥8000      |                              | -0.18 (0.13)    | 0.160            |             |
|              |                   |              |       |      |      |      | SNP*CED: 0   |                              | 0 (ref)         |                  |             |
|              |                   |              |       |      |      |      | - >0-4000    |                              | -0.05 (0.11)    | 0.658            |             |
|              |                   |              |       |      |      |      | - ≥4000-8000 |                              | -0.03 (0.13)    | 0.798            |             |
| - ≥8000      |                   | -0.16 (0.13) | 0.230 |      |      |      |              |                              |                 |                  |             |
| Hormones     |                   | -0.28 (0.07) | 0.000 |      |      |      |              |                              |                 |                  |             |
| <b>BRSKI</b> | <b>rs11668344</b> | 55833664     | 19    | A    | G    | 0.34 | 1            | rs11668344                   | 119/131/35      | 0.10 (0.04)      | 0.029       |
|              |                   |              |       |      |      |      |              | CED 0                        |                 | 0 (ref)          |             |
|              |                   |              |       |      |      |      |              | - >0-4000                    |                 | -0.09 (0.8)      | 0.226       |
|              |                   |              |       |      |      |      |              | - ≥4000-8000                 |                 | -0.32 (0.09)     | 0.000       |
|              |                   |              |       |      |      |      |              | - ≥8000                      |                 | -0.29 (0.09)     | 0.002       |
|              |                   |              |       |      |      |      |              | Hormones                     |                 | -0.28 (0.07)     | 0.000       |
|              |                   |              |       |      |      |      |              | 2                            | rs11668344      |                  | 0.14 (0.07) |
|              |                   |              |       |      |      |      | CED 0        |                              | 0 (ref)         |                  |             |
|              |                   |              |       |      |      |      | - >0-4000    |                              | -0.07 (0.11)    | 0.525            |             |
|              |                   |              |       |      |      |      | - ≥4000-8000 |                              | -0.29 (0.13)    | 0.026            |             |
|              |                   |              |       |      |      |      | - ≥8000      |                              | -0.19 (0.13)    | 0.134            |             |
|              |                   |              |       |      |      |      | SNP*CED: 0   |                              | 0 (ref)         |                  |             |
|              |                   |              |       |      |      |      | - >0-4000    |                              | -0.03 (0.11)    | 0.777            |             |
|              |                   |              |       |      |      |      | - ≥4000-8000 |                              | -0.04 (0.13)    | 0.732            |             |
| - ≥8000      |                   | -0.15 (0.13) | 0.248 |      |      |      |              |                              |                 |                  |             |
| Hormones     |                   | -0.28 (0.07) | 0.000 |      |      |      |              |                              |                 |                  |             |
| <b>FANCI</b> | <b>rs1054875</b>  | 89879126     | 15    | A    | T    | 0.36 | 1            | rs1054875                    | 121/130/34      | -0.06 (0.05)     | 0.197       |
|              |                   |              |       |      |      |      |              | CED 0                        |                 | 0 (ref)          |             |
|              |                   |              |       |      |      |      |              | - >0-4000                    |                 | -0.08 (0.08)     | 0.291       |
|              |                   |              |       |      |      |      |              | - ≥4000-8000                 |                 | -0.30 (0.09)     | 0.001       |
|              |                   |              |       |      |      |      |              | - ≥8000                      |                 | -0.29 (0.09)     | 0.002       |
|              |                   |              |       |      |      |      | Hormones     |                              | -0.27 (0.07)    | 0.000            |             |
|              |                   |              |       |      |      |      | 2            | rs1054875                    |                 | 0.01 (0.08)      | 0.950       |
|              |                   |              |       |      |      |      | CED 0        |                              | 0 (ref)         |                  |             |
|              |                   |              |       |      |      |      | - >0-4000    |                              | -0.04 (0.11)    | 0.749            |             |

(continued)

Supplementary Table SVIII Continued

| Gene         | Variant           | Position  | Chrom | Ref. | Alt. | MAF  | Model | Variant, interaction term | n alleles 0/1/2 | Beta (SE) logAMH | P-value |
|--------------|-------------------|-----------|-------|------|------|------|-------|---------------------------|-----------------|------------------|---------|
|              |                   |           |       |      |      |      |       | - ≥4000-8000              |                 | -0.25 (0.12)     | 0.048   |
|              |                   |           |       |      |      |      |       | - ≥8000                   |                 | -0.19 (0.13)     | 0.126   |
|              |                   |           |       |      |      |      |       | SNP*CED: 0                |                 | 0 (ref)          |         |
|              |                   |           |       |      |      |      |       | - >0-4000                 |                 | -0.07 (0.12)     | 0.560   |
|              |                   |           |       |      |      |      |       | - ≥4000-8000              |                 | -0.08 (0.13)     | 0.517   |
|              |                   |           |       |      |      |      |       | - ≥8000                   |                 | -0.15 (0.13)     | 0.264   |
|              |                   |           |       |      |      |      |       | Hormones                  |                 | -0.27 (0.07)     | 0.000   |
| <b>MCM8</b>  | <b>rs16991615</b> | 5948227   | 20    | G    | A    | 0.08 | 1     | rs16991615                | 242/41/2        | -0.07 (0.08)     | 0.390   |
|              |                   |           |       |      |      |      |       | CED 0                     |                 | 0 (ref)          |         |
|              |                   |           |       |      |      |      |       | - >0-4000                 |                 | -0.09 (0.08)     | 0.241   |
|              |                   |           |       |      |      |      |       | - ≥4000-8000              |                 | -0.31 (0.09)     | 0.000   |
|              |                   |           |       |      |      |      |       | - ≥8000                   |                 | -0.29 (0.09)     | 0.002   |
|              |                   |           |       |      |      |      |       | Hormones                  |                 | -0.27 (0.07)     | 0.000   |
|              |                   |           |       |      |      |      | 2     | rs16991615                |                 | 0.06 (0.13)      | 0.627   |
|              |                   |           |       |      |      |      |       | CED 0                     |                 | 0 (ref)          |         |
|              |                   |           |       |      |      |      |       | - >0-4000                 |                 | -0.07 (0.08)     | 0.425   |
|              |                   |           |       |      |      |      |       | - ≥4000-8000              |                 | -0.27 (0.09)     | 0.004   |
|              |                   |           |       |      |      |      |       | - ≥8000                   |                 | -0.25 (0.10)     | 0.013   |
|              |                   |           |       |      |      |      |       | SNP*CED: 0                |                 | 0 (ref)          |         |
|              |                   |           |       |      |      |      |       | - >0-4000                 |                 | -0.12 (0.20)     | 0.554   |
|              |                   |           |       |      |      |      |       | - ≥4000-8000              |                 | -0.24 (0.23)     | 0.300   |
|              |                   |           |       |      |      |      |       | - ≥8000                   |                 | -0.27 (0.22)     | 0.205   |
|              |                   |           |       |      |      |      |       | Hormones                  |                 | -0.28 (0.07)     | 0.000   |
| <b>UIMCI</b> | <b>rs365132</b>   | 176378574 | 5     | G    | T    | 0.5  | 1     | rs365132                  | 79/140/66       | 0.02 (0.04)      | 0.730   |
|              |                   |           |       |      |      |      |       | CED 0                     |                 | 0 (ref)          |         |
|              |                   |           |       |      |      |      |       | - >0-4000                 |                 | -0.09 (0.08)     | 0.240   |
|              |                   |           |       |      |      |      |       | - ≥4000-8000              |                 | -0.31 (0.09)     | 0.000   |
|              |                   |           |       |      |      |      |       | - ≥8000                   |                 | 0.29 (0.09)      | 0.001   |
|              |                   |           |       |      |      |      |       | Hormones                  |                 | -0.27 (0.07)     | 0.000   |
|              |                   |           |       |      |      |      | 2     | rs365132                  |                 | 0.01 (0.07)      | 0.907   |
|              |                   |           |       |      |      |      |       | CED 0                     |                 | 0 (ref)          |         |
|              |                   |           |       |      |      |      |       | - >0-4000                 |                 | 0.034 (0.14)     | 0.803   |
|              |                   |           |       |      |      |      |       | - ≥4000-8000              |                 | -0.39 (0.13)     | 0.004   |
|              |                   |           |       |      |      |      |       | - ≥8000                   |                 | -0.39 (0.15)     | 0.010   |
|              |                   |           |       |      |      |      |       | SNP*CED: 0                |                 | 0 (ref)          |         |
|              |                   |           |       |      |      |      |       | - >0-4000                 |                 | -0.11 (0.11)     | 0.301   |
|              |                   |           |       |      |      |      |       | - ≥4000-8000              |                 | 0.10 (0.11)      | 0.401   |
|              |                   |           |       |      |      |      |       | - ≥8000                   |                 | 0.12 (0.14)      | 0.393   |
|              |                   |           |       |      |      |      |       | Hormones                  |                 | -0.26 (0.07)     | 0.000   |
| <b>RAD51</b> | <b>rs9796</b>     | 41271447  | 15    | A    | T    | 0.42 | 1     | rs9796                    | 99/126/60       | -0.02 (0.04)     | 0.690   |
|              |                   |           |       |      |      |      |       | CED 0                     |                 | 0 (ref)          |         |
|              |                   |           |       |      |      |      |       | - >0-4000                 |                 | -0.09 (0.08)     | 0.251   |
|              |                   |           |       |      |      |      |       | - ≥4000-8000              |                 | -0.31 (0.09)     | 0.000   |
|              |                   |           |       |      |      |      |       | - ≥8000                   |                 | -0.29 (0.09)     | 0.002   |
|              |                   |           |       |      |      |      |       | Hormones                  |                 | -0.27 (0.07)     | 0.000   |
|              |                   |           |       |      |      |      | 2     | rs9796                    |                 | -0.01 (0.72)     | 0.857   |
|              |                   |           |       |      |      |      |       | CED 0                     |                 | 0 (ref)          |         |
|              |                   |           |       |      |      |      |       | - >0-4000                 |                 | -0.14 (0.12)     | 0.246   |

(continued)

**Supplementary Table SVIII Continued**

| Gene | Variant | Position | Chrom | Ref. | Alt. | MAF | Model | Variant,<br>interaction term | n alleles 0/1/2 | Beta (SE) logAMH | P-value |
|------|---------|----------|-------|------|------|-----|-------|------------------------------|-----------------|------------------|---------|
|      |         |          |       |      |      |     |       | - ≥4000-8000                 |                 | -0.37 (0.13)     | 0.005   |
|      |         |          |       |      |      |     |       | - ≥8000                      |                 | -0.11 (0.14)     | 0.447   |
|      |         |          |       |      |      |     |       | SNP*CED: 0                   |                 | 0 (ref)          |         |
|      |         |          |       |      |      |     |       | - >0-4000                    |                 | 0.05 (0.10)      | 0.606   |
|      |         |          |       |      |      |     |       | - ≥4000-8000                 |                 | 0.08 (0.12)      | 0.519   |
|      |         |          |       |      |      |     |       | - ≥8000                      |                 | -0.20 (0.12)     | 0.109   |
|      |         |          |       |      |      |     |       | Hormones                     |                 | -0.26 (0.07)     | 0.000   |

Alt, alternative allele; AMH, anti-Müllerian hormone in µg/L; CED, cyclophosphamide equivalent dose in mg/m<sup>2</sup>; Chrom., chromosome; MAF, minor allele frequency; Ref, Reference allele; VEVO, DCOG-LATER VEVO cohort.

Position based on position build 37 on <https://www.ncbi.nlm.nih.gov/snp/>. Alt is coded. Model 1: adjusted for principal components, hormone usage, CED score in four categories, and age at time of study. Model 2: additional to Model 1 interaction term of variant\*CED category.
