# Supplementary material for: Possible modification of BRSK1 on the risk of alkylating chemotherapy-related reduced ovarian function
Source: PubMed Central journal article supplement — Hum Reprod. 2021 Feb 14;36(4):1120–33. doi: 10.1093/humrep/deaa342 (PMC7970730; doi:10.1093/humrep/deaa342), 2021-02-14
Supplement: deaa342_supplementary_tables9.pdf [file deaa342_supplementary_tables9.pdf]

**Supplementary Table SIX Association of SNPs with continuous log-transformed AMH-levels in the discovery VEVO cohort in women aged 18–40 at time of study (n = 270).**

| Gene         | Variant           | Position | Model        | Variant, interaction term | Beta (SE) logAMH | P-value     |       |
|--------------|-------------------|----------|--------------|---------------------------|------------------|-------------|-------|
| <b>BRSK1</b> | <b>rs11668344</b> | 55833664 | 1            | rs11668344                | 0.08 (0.04)      | 0.057       |       |
|              |                   |          |              | CED: 0                    | 0 (ref)          |             |       |
|              |                   |          |              | – >0–4000                 | –0.05 (0.07)     | 0.474       |       |
|              |                   |          |              | – ≥4000–8000              | –0.29 (0.08)     | 0.000       |       |
|              |                   |          |              | – ≥8000                   | –0.30 (0.09)     | 0.001       |       |
|              |                   |          |              | Hormones                  | –0.29 (0.06)     | 0.000       |       |
|              |                   |          |              | 2                         | rs11668344       | 0.11 (0.07) | 0.112 |
|              |                   |          |              |                           | CED: 0           | 0 (ref)     |       |
|              |                   |          | – >0–4000    |                           | –0.04 (0.10)     | 0.715       |       |
|              |                   |          | – ≥4000–8000 |                           | –0.29 (0.12)     | 0.014       |       |
|              |                   |          | – ≥8000      |                           | –0.16 (0.13)     | 0.207       |       |
|              |                   |          | SNP*CED: 0   |                           | 0 (ref)          |             |       |
|              |                   |          | – >0–4000    |                           | –0.02 (0.10)     | 0.876       |       |
|              |                   |          | – ≥4000–8000 |                           | –0.03 (0.12)     | 0.977       |       |
|              |                   |          |              | – ≥8000                   | –0.19 (0.13)     | 0.147       |       |
|              |                   |          |              | Hormones                  | –0.29 (0.06)     | 0.000       |       |
| <b>FANCI</b> | <b>rs1054875</b>  | 89879126 | 1            | rs1054875                 | 0.002 (0.04)     | 0.961       |       |
|              |                   |          |              | CED: 0                    | 0 (ref)          |             |       |
|              |                   |          |              | – >0–4000                 | –0.05 (0.07)     | 0.508       |       |
|              |                   |          |              | – ≥4000–8000              | –0.29 (0.08)     | 0.000       |       |
|              |                   |          |              | – ≥8000                   | –0.29 (0.09)     | 0.001       |       |
|              |                   |          |              | Hormones                  | –0.28 (0.06)     | 0.000       |       |
|              |                   |          |              | 2                         | rs1054875        | 0.11 (0.08) | 0.135 |
|              |                   |          |              |                           | CED: 0           | 0 (ref)     |       |
|              |                   |          | – >0–4000    |                           | 0.074 (0.10)     | 0.474       |       |
|              |                   |          | – ≥4000–8000 |                           | –0.22 (0.11)     | 0.058       |       |
|              |                   |          | – ≥8000      |                           | –0.16 (0.12)     | 0.175       |       |
|              |                   |          | SNP*CED: 0   |                           | 0 (ref)          |             |       |
|              |                   |          | – >0–4000    |                           | –0.18 (0.11)     | 0.102       |       |
|              |                   |          | – ≥4000–8000 |                           | –0.11 (0.12)     | 0.356       |       |
|              |                   |          |              | – ≥8000                   | –0.21 (0.13)     | 0.111       |       |
|              |                   |          |              | Hormones                  | –0.28 (0.06)     | 0.000       |       |

AMH, anti-Müllerian hormone in µg/L; CED, cyclophosphamide equivalent dose in mg/m<sup>2</sup>; SNP, single-nucleotide polymorphism; VEVO, DCOG-LATER VEVO cohort. Position based on position build 37 on <https://www.ncbi.nlm.nih.gov/snp/>. Alt is coded. Model 1: adjusted for principal components, hormone usage, CED score in four categories, and age at time of study. Model 2: additional to Model 1 interaction term of variant\*CED category.
