# Supplementary material for: Possible modification of BRSK1 on the risk of alkylating chemotherapy-related reduced ovarian function
Source: PubMed Central journal article supplement — Hum Reprod. 2021 Feb 14;36(4):1120–33. doi: 10.1093/humrep/deaa342 (PMC7970730; doi:10.1093/humrep/deaa342), 2021-02-14
Supplement: deaa342_supplementary_tables11.pdf [file deaa342_supplementary_tables11.pdf]

**Supplementary Table SXI Association of SNPs with continuous log-transformed AMH levels in the replication cohorts.**

| Gene         | Variant           | Model        | Variant, interaction term | Continuous log-transformed AMH-levels (linear model) |               |                  |              |      |
|--------------|-------------------|--------------|---------------------------|------------------------------------------------------|---------------|------------------|--------------|------|
|              |                   |              |                           | PanCareLIFE                                          |               | SJLIFE           |              |      |
|              |                   |              |                           | Beta (SE) logAMH                                     | P-value       | Beta (SE) logAMH | P-value      |      |
| <b>BRSKI</b> | <b>rs1172822</b>  | <b>1</b>     | rs1172822                 | 0.002 (0.05)                                         | 0.937         | -0.19 (0.09)     | 0.03         |      |
|              |                   |              | CED: 0                    | 0 (ref)                                              |               | 0 (ref)          | 0.11         |      |
|              |                   |              | - >0-4000                 | -0.050 (0.092)                                       | 0.032         | 0.17 (0.29)      | 0.56         |      |
|              |                   |              | - ≥4000-8000              | -0.226 (0.104)                                       | 0.000         | -0.26 (0.17)     | 0.13         |      |
|              |                   |              | - ≥8000                   | -0.870 (0.083)                                       | 0.000         | -0.31 (0.16)     | 0.05         |      |
|              |                   |              | Hormones                  | NA                                                   |               | -0.10 (0.14)     | 0.48         |      |
|              |                   |              | <b>2</b>                  | rs1172822                                            | 0.025 (0.083) | 0.762            | -0.18 (0.12) | 0.13 |
|              |                   |              |                           | CED: 0                                               | 0 (ref)       |                  | 0 (ref)      | 0.28 |
|              |                   | - >0-4000    |                           | 0.024 (0.129)                                        | 0.850         | 0.29 (0.43)      | 0.50         |      |
|              |                   | - ≥4000-8000 |                           | -0.198 (0.146)                                       | 0.177         | -0.39 (0.24)     | 0.11         |      |
|              |                   | - ≥8000      |                           | -0.895 (0.125)                                       | 0.000         | -0.20 (0.23)     | 0.39         |      |
|              |                   | SNP*CED: 0   |                           | 0 (ref)                                              |               | 0 (ref)          | 0.63         |      |
|              |                   | - >0-4000    |                           | -0.111 (0.134)                                       | 0.408         | -0.14 (0.36)     | 0.71         |      |
|              |                   | - ≥4000-8000 |                           | -0.043 (0.159)                                       | 0.785         | 0.20 (0.25)      | 0.42         |      |
|              |                   | - ≥8000      | 0.026 (0.124)             | 0.833                                                | -0.17 (0.23)  | 0.46             |              |      |
|              |                   | Hormones     | NA                        |                                                      | -0.09 (0.14)  | 0.52             |              |      |
| <b>BRSKI</b> | <b>rs11668344</b> | <b>1</b>     | rs11668344                | 0.003 (0.05)                                         | 0.953         | -0.19 (0.09)     | 0.03         |      |
|              |                   |              | CED: 0                    | 0 (ref)                                              |               | 0 (ref)          | 0.12         |      |
|              |                   |              | - >0-4000                 | -0.050 (0.092)                                       | 0.031         | 0.17 (0.29)      | 0.56         |      |
|              |                   |              | - ≥4000-8000              | -0.226 (0.104)                                       | 0.000         | -0.25 (0.17)     | 0.14         |      |
|              |                   |              | - ≥8000                   | -0.873 (0.085)                                       | 0.000         | -0.31 (0.16)     | 0.05         |      |
|              |                   |              | Hormones                  | NA                                                   |               | -0.10 (0.14)     | 0.47         |      |
|              |                   |              | <b>2</b>                  | rs11668344                                           | 0.031 (0.084) | 0.708            | -0.16 (0.12) | 0.18 |
|              |                   |              |                           | CED: 0                                               | 0 (ref)       |                  | 0 (ref)      | 0.34 |
|              |                   | - >0-4000    |                           | 0.022 (0.125)                                        | 0.860         | 0.27 (0.41)      | 0.51         |      |
|              |                   | - ≥4000-8000 |                           | -0.192 (0.144)                                       | 0.185         | -0.37 (0.24)     | 0.12         |      |
|              |                   | - ≥8000      |                           | -0.890 (0.123)                                       | 0.000         | -0.15 (0.22)     | 0.50         |      |
|              |                   | SNP*CED: 0   |                           | 0 (ref)                                              |               | 0 (ref)          | 0.55         |      |
|              |                   | - >0-4000    |                           | -0.114 (0.133)                                       | 0.393         | -0.12 (0.35)     | 0.73         |      |
|              |                   | - ≥4000-8000 |                           | -0.054 (0.159)                                       | 0.732         | 0.18 (0.25)      | 0.47         |      |
|              |                   | - ≥8000      | 0.021 (0.127)             | 0.870                                                | -0.23 (0.23)  | 0.31             |              |      |
|              |                   | Hormones     | NA                        |                                                      | -0.09 (0.14)  | 0.50             |              |      |
| <b>FANCI</b> | <b>rs1054875</b>  | <b>1</b>     | rs1054875                 | 0.001 (0.049)                                        | 0.983         | 0.15 (0.09)      | 0.10         |      |
|              |                   |              | CED: 0                    | 0 (ref)                                              |               | 0 (ref)          | 0.14         |      |
|              |                   |              | - >0-4000                 | -0.050 (0.092)                                       | 0.585         | 0.15 (0.29)      | 0.61         |      |
|              |                   |              | - ≥4000-8000              | -0.226 (0.104)                                       | 0.031         | -0.25 (0.17)     | 0.13         |      |
|              |                   |              | - ≥8000                   | -0.872 (0.085)                                       | 0.000         | -0.30 (0.16)     | 0.06         |      |
|              |                   |              | Hormones                  | NA                                                   |               | -0.13 (0.14)     | 0.34         |      |
|              |                   | <b>2</b>     | rs1054875                 | 0.057 (0.084)                                        | 0.495         | 0.13 (0.13)      | 0.32         |      |
|              |                   |              | CED: 0                    | 0 (ref)                                              |               | 0 (ref)          | 0.53         |      |

(continued)

**Supplementary Table SXI Continued**

| Gene | Variant | Model | Variant, interaction term | Continuous log-transformed AMH-levels (linear model) |         |                  |         |
|------|---------|-------|---------------------------|------------------------------------------------------|---------|------------------|---------|
|      |         |       |                           | PanCareLIFE                                          |         | SJLIFE           |         |
|      |         |       |                           | Beta (SE) logAMH                                     | P-value | Beta (SE) logAMH | P-value |
|      |         |       | - >0-4000                 | -0.012 (0.146)                                       | 0.935   | -0.02 (0.45)     | 0.97    |
|      |         |       | - ≥4000-8000              | -0.282 (0.173)                                       | 0.104   | -0.28 (0.25)     | 0.28    |
|      |         |       | - ≥8000                   | -0.735 (0.129)                                       | 0.000   | -0.30 (0.24)     | 0.21    |
|      |         |       | SNP*CED: 0                | 0 (ref)                                              |         | 0 (ref)          | 0.97    |
|      |         |       | - >0-4000                 | -0.048 (0.136)                                       | 0.724   | 0.21 (0.44)      | 0.63    |
|      |         |       | - ≥4000-8000              | 0.053 (0.157)                                        | 0.736   | 0.03 (0.23)      | 0.90    |
|      |         |       | - ≥8000                   | -0.169 (0.121)                                       | 0.163   | 0.01 (0.22)      | 0.97    |
|      |         |       | Hormones                  | NA                                                   |         | -0.13 (0.14)     | 0.36    |

AMH, anti-Müllerian hormone in µg/L; CED, cyclophosphamide equivalent dose in mg/m<sup>2</sup>; PanCareLIFE, PanCareLIFE cohort; SNP, single-nucleotide polymorphism; St. Jude Lifetime, St. Jude Lifetime Cohort.

Model 1: adjusted for principal components, hormone usage, CED score in four categories, and age at time of study (linear model only). Model 2: additional to Model 1 interaction term of variant\*CED category.
