# Supplementary material for: Possible modification of BRSK1 on the risk of alkylating chemotherapy-related reduced ovarian function
Source: PubMed Central journal article supplement — Hum Reprod. 2021 Feb 14;36(4):1120–33. doi: 10.1093/humrep/deaa342 (PMC7970730; doi:10.1093/humrep/deaa342), 2021-02-14
Supplement: deaa342_supplementary_tables12.pdf [file deaa342_supplementary_tables12.pdf]

**Supplementary Table SXII Association of replicated SNPs with reduced ovarian function in the meta-analyses.**

| Variant      | Model | variant, interaction | Replication (PCL+SJLIFE) meta-analysis |           |                              | Discovery + Replication (VEVO + PCL + SJLIFE) meta-analysis |           |                              |
|--------------|-------|----------------------|----------------------------------------|-----------|------------------------------|-------------------------------------------------------------|-----------|------------------------------|
|              |       |                      | OR (95% CI)                            | Direction | P-value                      | OR (95% CI)                                                 | Direction | P-value                      |
| <i>BRSK1</i> | 1     | rs11668344           | 1.09 (0.83–1.45)                       | ++        | 0.530                        | 0.92 (0.72–1.17)                                            | ---       | 0.480                        |
| rs11668344   |       | CED: 0               | 1 (ref)                                |           | 0.001                        | 1 (ref)                                                     |           | 2.0 × 10 <sup>-5</sup>       |
| A > G        |       | - >0–4000            | 1.23 (0.61–2.47)                       | +-        | 0.569                        | 1.31 (0.80–2.21)                                            | +++       | 0.309                        |
|              |       | - ≥4000–8000         | 3.40 (1.94–5.96)                       | ++        | 1.9 × 10 <sup>-5</sup>       | 3.73 (2.31–6.01)                                            | +++       | 6.3 × 10 <sup>-8</sup>       |
|              |       | - ≥8000              | 3.90 (2.38–6.39)                       | ++        | 6.2 × 10 <sup>-5</sup>       | 4.07 (2.59–6.39)                                            | +++       | 1.0 × 10 <sup>-9</sup>       |
|              | 2     | rs11668344           | 0.82 (0.54–1.24)                       | -+        | 0.349                        | 0.76 (0.53–1.11)                                            | ---       | 0.152                        |
|              |       | CED: 0               | 1 (ref)                                |           | 5.5 × 10 <sup>-4</sup>       | 1 (ref)                                                     |           | 5.6 × 10 <sup>-4</sup>       |
|              |       | - >0–4000            | 0.58 (0.21–1.58)                       | --        | 0.284                        | 0.98 (0.46–2.09)                                            | +-        | 0.964                        |
|              |       | - ≥4000–8000         | 3.42 (1.52–7.67)                       | ++        | 2.8 × 10 <sup>-4</sup>       | 3.83 (1.90–7.74)                                            | +++       | 1.8 × 10 <sup>-4</sup>       |
|              |       | - ≥8000              | 1.92 (0.97–3.79)                       | +-        | 0.059                        | 1.92 (1.04–3.56)                                            | +++       | 0.038                        |
|              |       | SNP*CED: 0           | 1 (ref)                                |           | 0.016                        | 1 (ref)                                                     |           | 0.018                        |
|              |       | - >0–4000            | 3.27 (1.11–9.66)                       | +-        | 0.032                        | 1.57 (0.71–3.47)                                            | +-        | 0.269                        |
|              |       | - ≥4000–8000         | 1.04 (0.44–2.48)                       | +-        | 0.922                        | 0.98 (0.48–2.02)                                            | +-        | 0.960                        |
|              |       | - ≥8000              | 3.63 (1.66–7.95)                       | ++        | 1.3 × 10 <sup>-3</sup>       | 3.81 (1.85–7.86)                                            | +++       | 3.0 × 10 <sup>-4</sup>       |
| <i>FANCI</i> | 1     | rs1054875            | 1.03 (0.78–1.37)                       | +-        | 0.844                        | 1.02 (0.80–1.31)                                            | +++       | 0.852                        |
| rs1054875    |       | CED: 0               | 1 (ref)                                |           | 0.001                        | 1 (ref)                                                     |           | 1.5 × 10 <sup>-5</sup>       |
| A > T        |       | - >0–4000            | 1.20 (0.59–2.41)                       | +-        | 0.617                        | 1.27 (0.76–2.13)                                            | +++       | 0.364                        |
|              |       | - ≥4000–8000         | 3.46 (1.96–6.11)                       | ++        | 1.8 × 10 <sup>-5</sup>       | 3.66 (2.27–5.90)                                            | +++       | 9.8 × 10 <sup>-8</sup>       |
|              |       | - ≥8000              | 3.84 (2.34–6.30)                       | ++        | 9.6 × 10 <sup>-8</sup>       | 4.02 (2.56–6.30)                                            | +++       | 1.5 × 10 <sup>-9</sup>       |
|              | 2     | rs1054875            | 1.01 (0.65–1.56)                       | +-        | 0.977                        | 0.85 (0.57–1.28)                                            | +-        | 0.432                        |
|              |       | CED: 0               | 1 (ref)                                |           | 0.002                        | 1 (ref)                                                     |           | 2.0 × 10 <sup>-4</sup>       |
|              |       | - >0–4000            | 0.88 (0.28–2.80)                       | +-        | 0.828                        | 0.54 (0.23–1.24)                                            | +-        | 0.148                        |
|              |       | - ≥4000–8000         | 5.29 (2.08–13.50)                      | ++        | 4.7 × 10 <sup>-4</sup>       | 3.91 (1.83–8.33)                                            | +++       | 4.1 × 10 <sup>-4</sup>       |
|              |       | - ≥8000              | 3.79 (1.83–7.83)                       | ++        | 3.2 × 10 <sup>-4</sup>       | 3.77 (1.97–7.24)                                            | +++       | 6.5 × 10 <sup>-5</sup>       |
|              |       | SNP*CED: 0           | 1 (ref)                                |           | 0.869                        | 1 (ref)                                                     |           | 0.146                        |
|              |       | - >0–4000            | 1.35 (0.46–3.96)                       | ++        | 0.583                        | 2.76 (1.17–6.53)                                            | +++       | 0.021                        |
|              |       | - ≥4000–8000         | 0.64 (0.29–1.40)                       | --        | 0.264                        | 0.92 (0.46–1.86)                                            | +-        | 0.823                        |
|              |       | - ≥8000              | 1.03 (0.53–2.03)                       | ++        | 0.925                        | 1.14 (0.61–2.12)                                            | +++       | 0.691                        |
| <i>BRSK1</i> | 1     | rs1172822            | 1.14 (0.86–1.50)                       | ++        | 0.352                        | 0.97 (0.77–1.23)                                            | ---       | 0.808                        |
| rs1172822    |       | CED: 0               | 1 (ref)                                |           | 0.001                        | 1 (ref)                                                     |           | 2.0 × 10 <sup>-5</sup>       |
| C > T        |       | - >0–4000            | 1.23 (0.61–2.47)                       | +-        | 0.562                        | 1.29 (0.77–2.17)                                            | +++       | 0.333                        |
|              |       | - ≥4000–8000         | 3.40 (1.94–5.97)                       | ++        | 1.9 × 10 <sup>-5</sup>       | 3.68 (2.29–5.91)                                            | +++       | 7.8 × 10 <sup>-8</sup>       |
|              |       | - ≥8000              | 3.92 (2.39–6.42)                       | ++        | 5.8 × 10 <sup>-8</sup>       | 4.04 (2.57–6.34)                                            | +++       | 1.2 × 10 <sup>-9</sup>       |
|              | 2     | rs1172822            | 0.89 (0.59–1.36)                       | -+        | 0.599                        | 0.82 (0.57–1.20)                                            | ---       | 0.311                        |
|              |       | CED: 0               | 1 (ref)                                |           | 5.5 × 10 <sup>-4</sup>       | 1 (ref)                                                     |           | 7.6 × 10 <sup>-5</sup>       |
|              |       | - >0–4000            | 0.66 (0.24–1.83)                       | -+        | 0.422                        | 1.00 (0.46–2.16)                                            | +-        | 0.998                        |
|              |       | - ≥4000–8000         | 3.69 (1.65–8.26)                       | ++        | 1.5 × 10 <sup>-3</sup>       | 3.98 (1.96–8.06)                                            | +++       | 1.3 × 10 <sup>-4</sup>       |
|              |       | - ≥8000              | 2.00 (1.02–3.94)                       | +-        | 0.045                        | 1.91 (1.03–3.53)                                            | +++       | 0.039                        |
|              |       | SNP*CED: 0           | 1 (ref)                                |           | 0.025                        | 1 (ref)                                                     |           | 0.025                        |
|              |       | - >0–4000            | 2.61 (0.90–7.56)                       | +-        | 0.078                        | 1.45 (0.67–3.17)                                            | +-        | 0.346                        |
|              |       | - ≥4000–8000         | 0.93 (0.40–2.19)                       | +-        | 0.870                        | 0.92 (0.45–1.88)                                            | +-        | 0.811                        |
|              |       | - ≥8000              | 3.33 (1.55–7.16)                       | ++        | <b>2.0 × 10<sup>-3</sup></b> | 3.71 (1.79–7.67)                                            | +++       | <b>4.2 × 10<sup>-4</sup></b> |

CED, cyclophosphamide equivalent dose in mg/m<sup>2</sup>; Het, Estimated heterogeneity variance; PanCareLIFE, PanCareLIFE cohort; St. Jude Lifetime, St. Jude Lifetime Cohort; VEVO, DCOG-LATER VEVO cohort.

Alt is coded. Model 1: adjusted for principal components, hormone usage, and CED score in four categories. Model 2: additional to Model 1 interaction term of variant\*CED category. + = positive association of the SNP with reduced ovarian function in PCL and SJLIFE respectively. - = negative association of the SNP with reduced ovarian function in VEVO, PCL and SJLIFE, respectively. Pooled estimates based on the fixed effects model are presented.
